# Supplementary material for: CircRNA Arf3 suppresses glomerular mesangial cell proliferation and fibrosis in diabetic nephropathy via miR-107-3p/Tmbim6 axis
Source: Springer Nature journal article supplement (doi:10.1007/s10863-024-10027-w), 2024-08-09

## Marker-1 (M1)

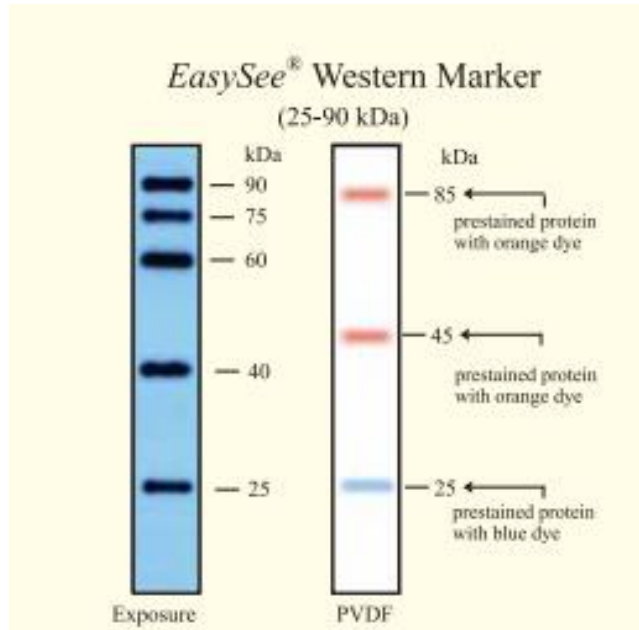

## Marker-2 (M2)

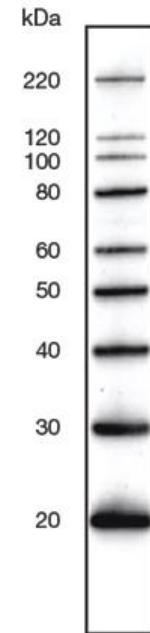

Fig2 D

1

2

3

PCNA  
(30 KD)

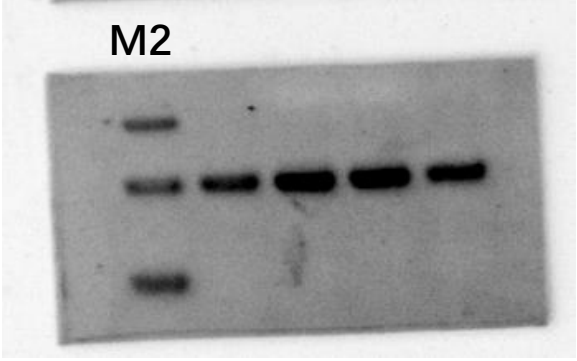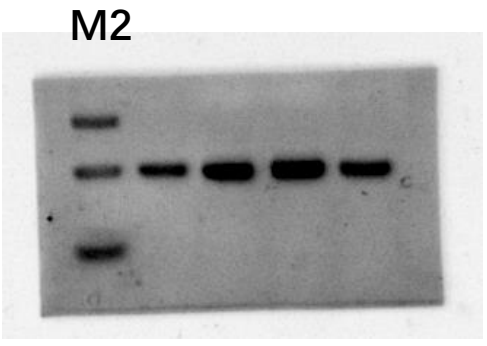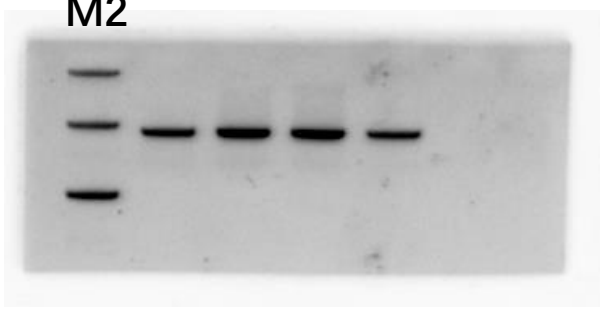

GAPDH  
(36 KD)

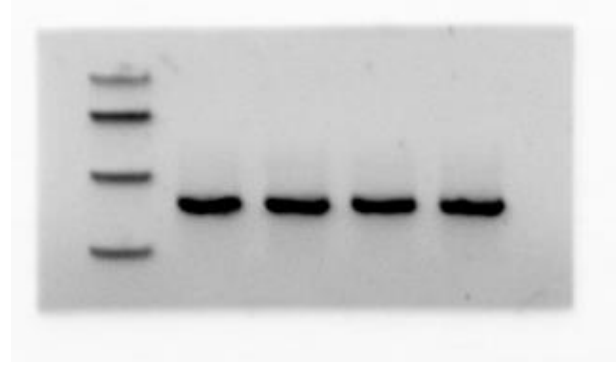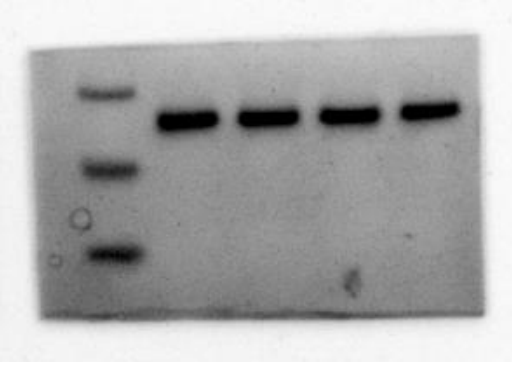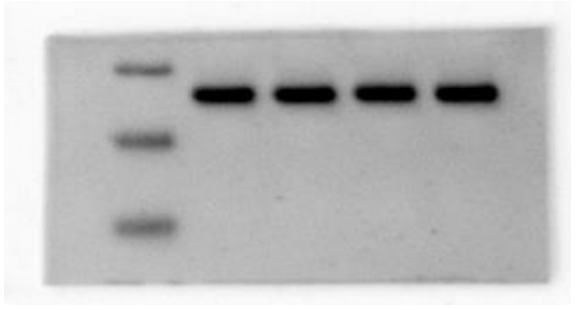

**Fig2 E**

**1**

**2**

**3**

**M1**

**M2**

**M2**

**$\alpha$ -SMA**  
(33 KD)

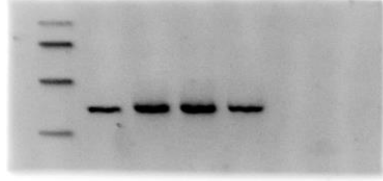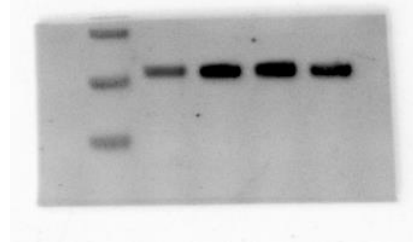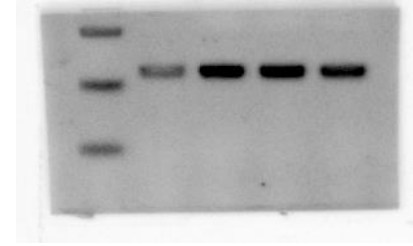

**Col I**  
(139 KD)

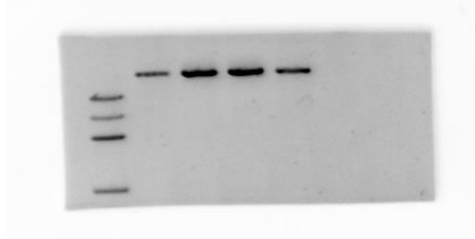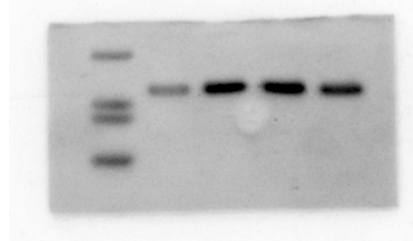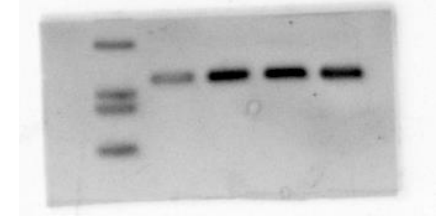

**FN**  
(285 KD)

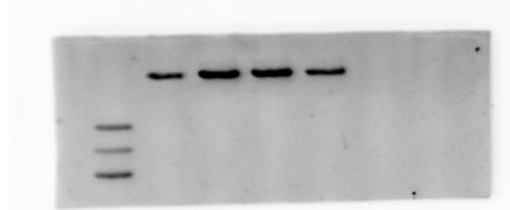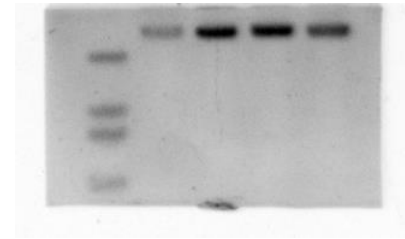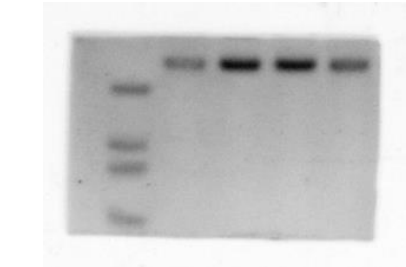

**Col IV**  
(163 KD)

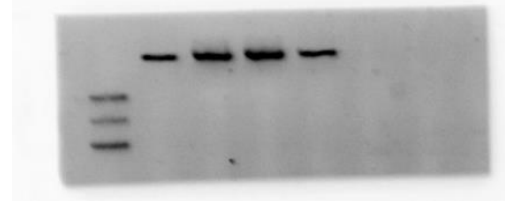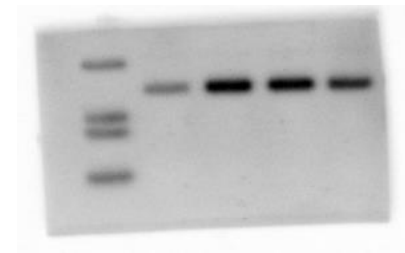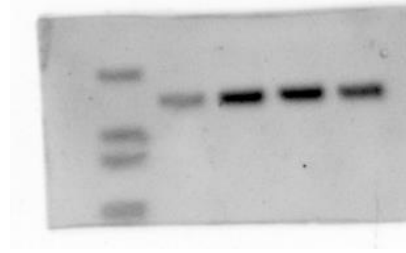

**GAPDH**  
(36 KD)

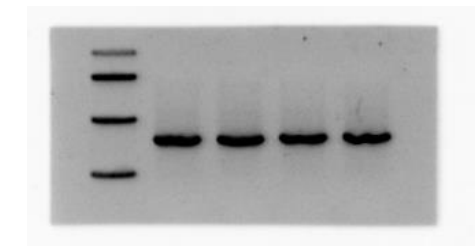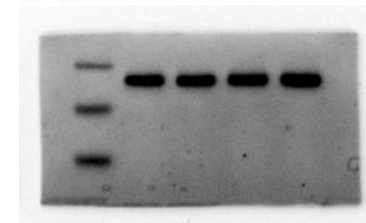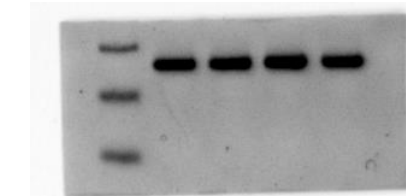

Fig4 D

1

2

3

M1

M2

M2

PCNA  
(30 KD)

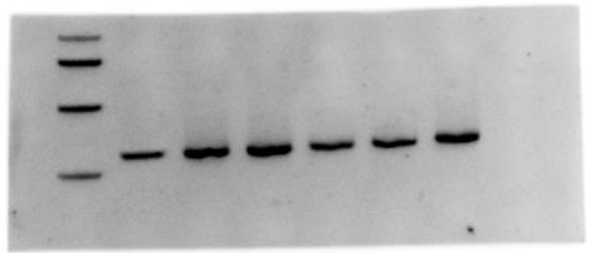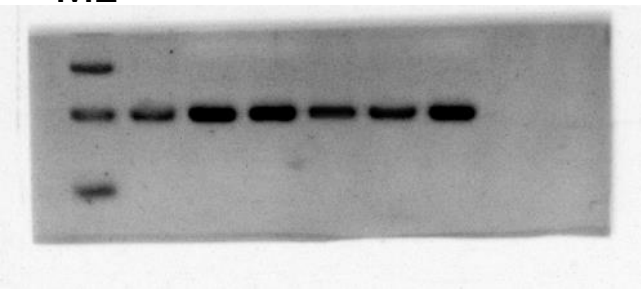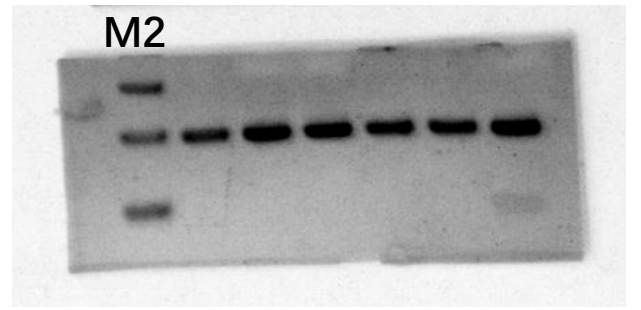

GAPDH  
(36 KD)

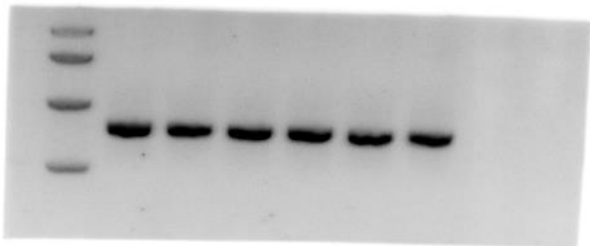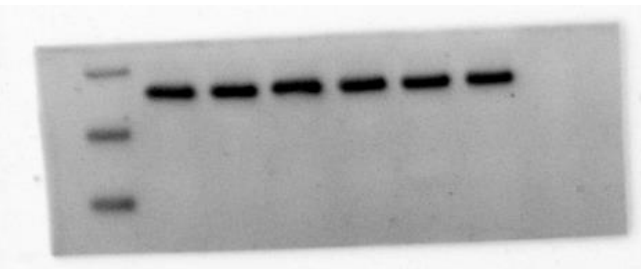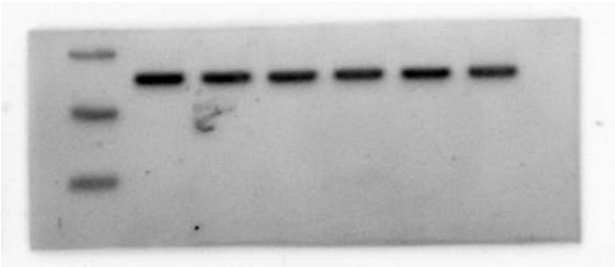

**Fig4 E**

**1**

**2**

**3**

M1

M2

M2

**$\alpha$ -SMA**  
(33 KD)

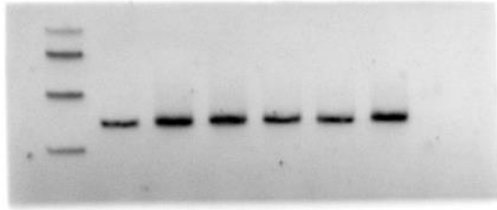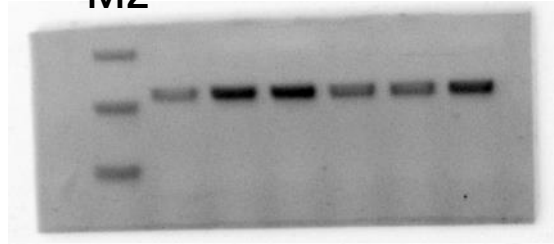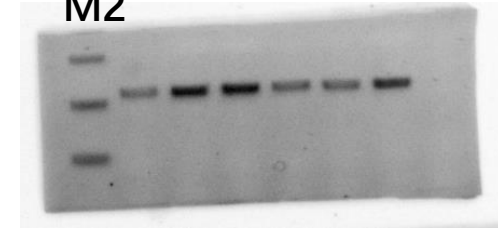

**Col I**  
(139 KD)

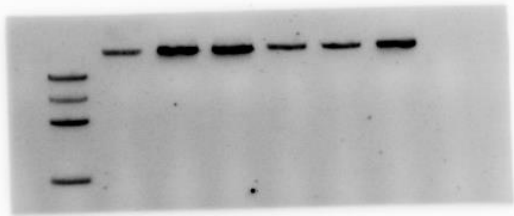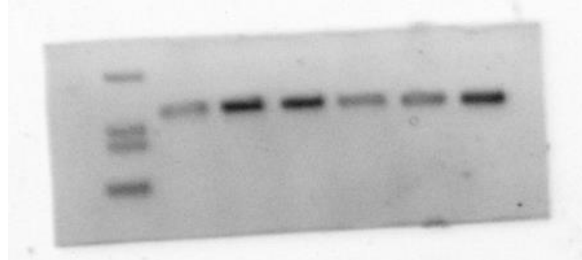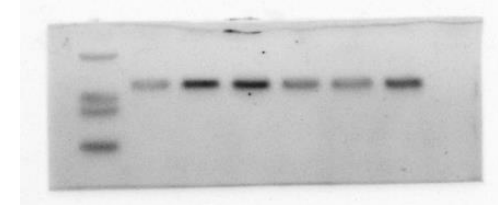

**FN**  
(285 KD)

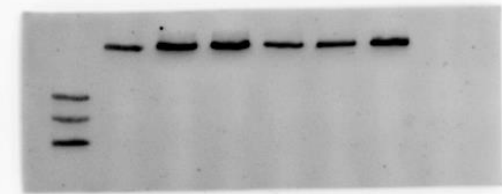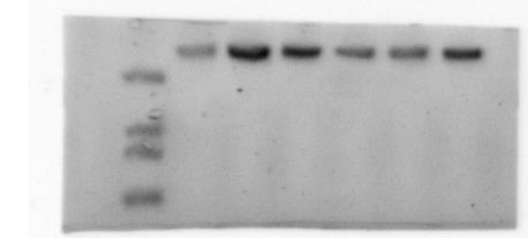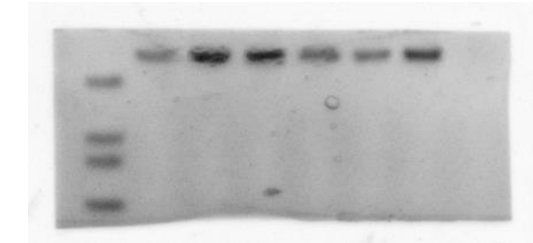

**Col IV**  
(163 KD)

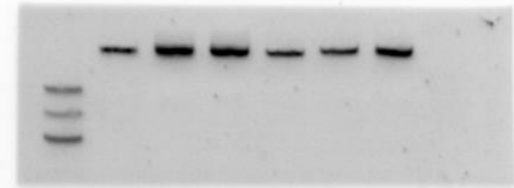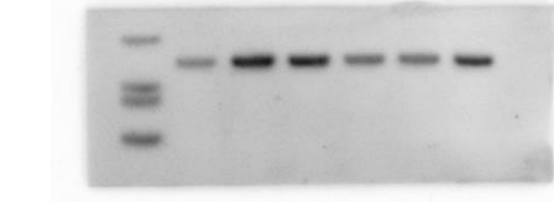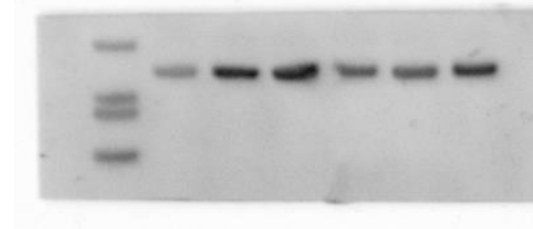

**GAPDH**  
(36 KD)

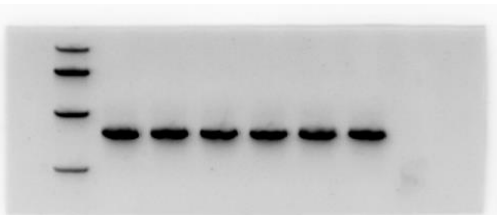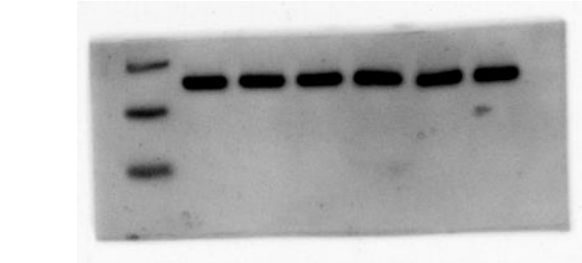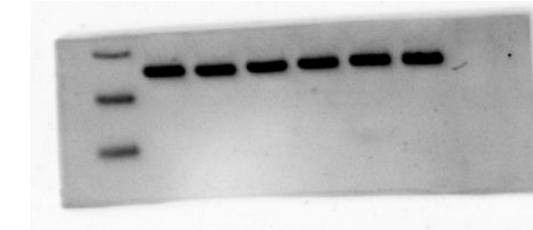

**Fig5 F**

**1**

**2**

**3**

**Tmbim6**  
(24 KD)

M2

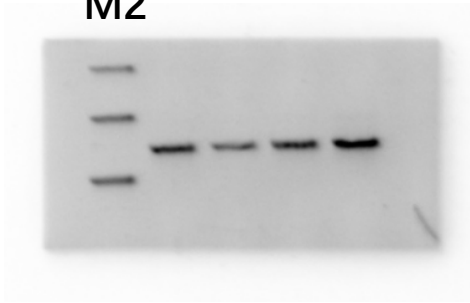

M2

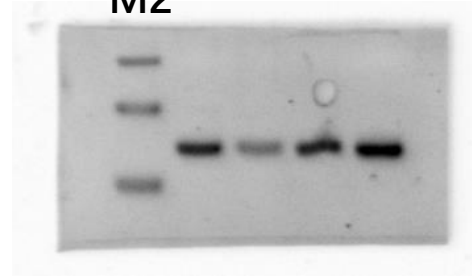

M2

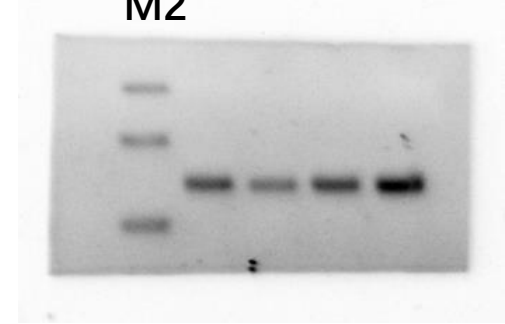

**GAPDH**  
(36 KD)

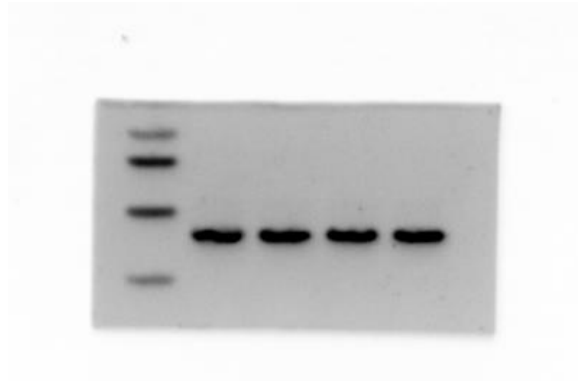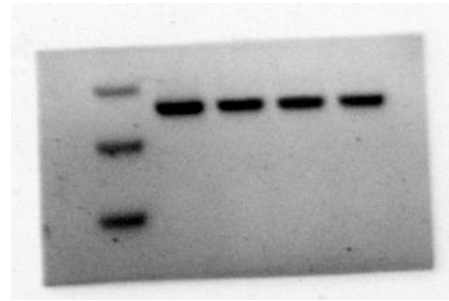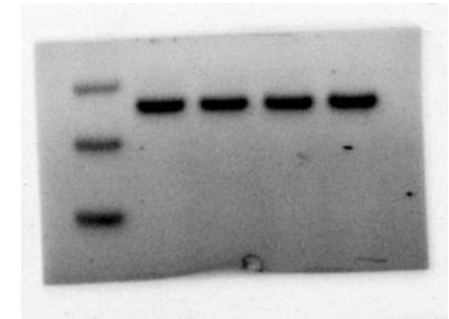

**Fig5 H**

**1**

**2**

**3**

**Tmbim6**  
(24 KD)

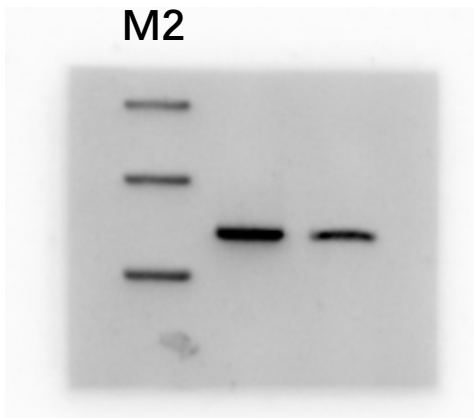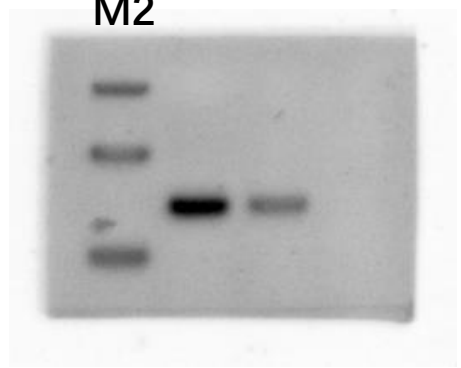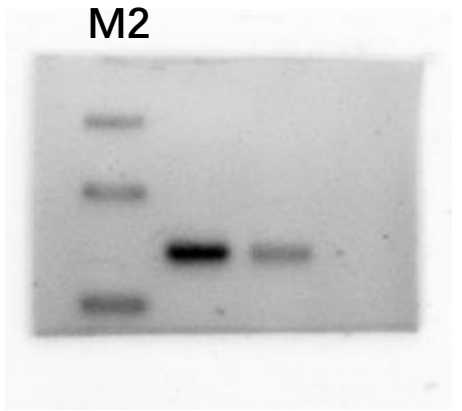

**GAPDH**  
(36 KD)

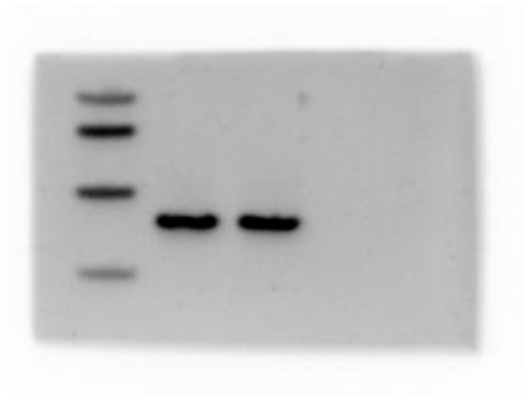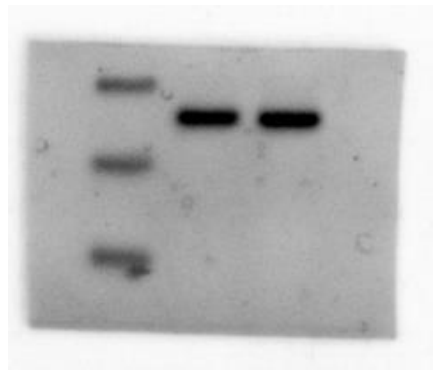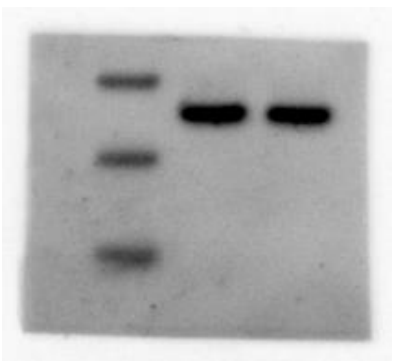

**Fig5 I**

**1**

**2**

**3**

M2

M2

M2

**Tmbim6**  
(24 KD)

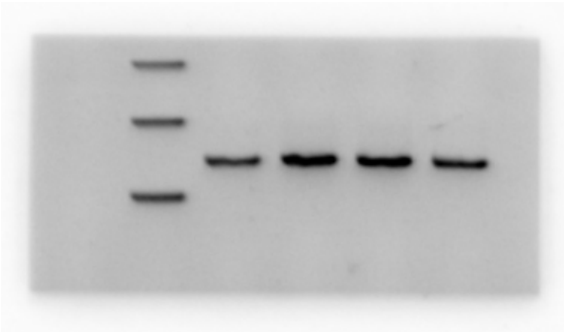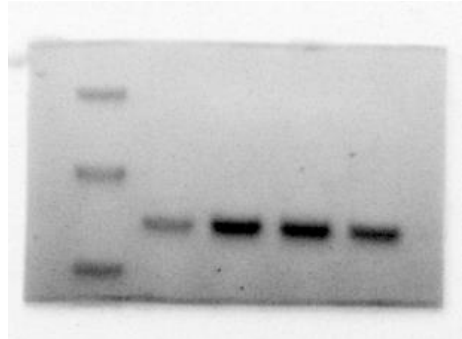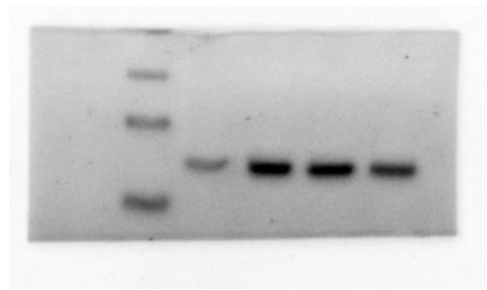

**GAPDH**  
(36 KD)

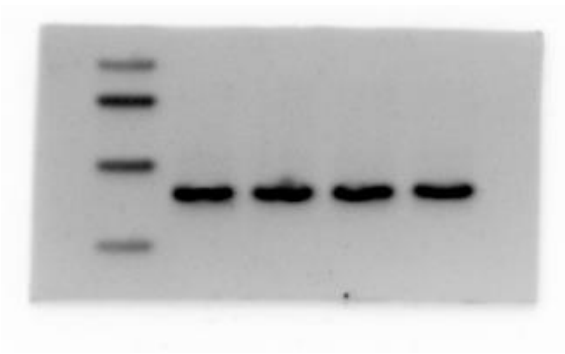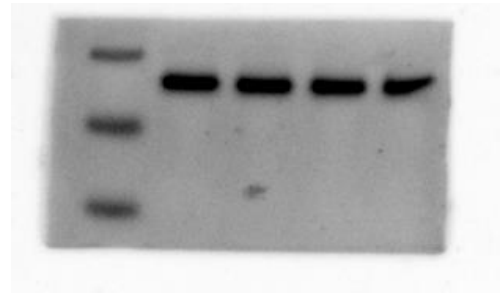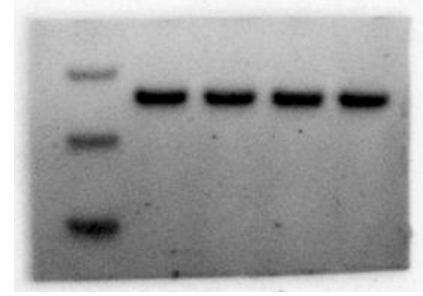

**Fig6 B**

**1**

**2**

**3**

M2

M2

M2

**Tmbim6**  
(24 KD)

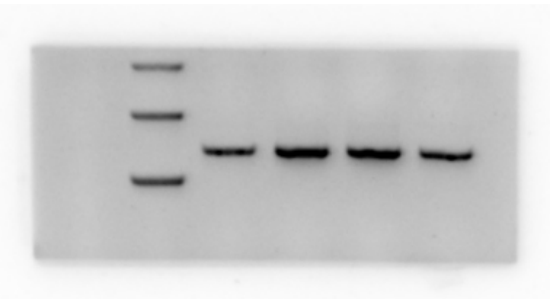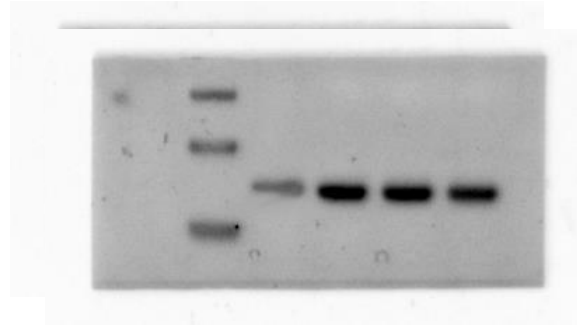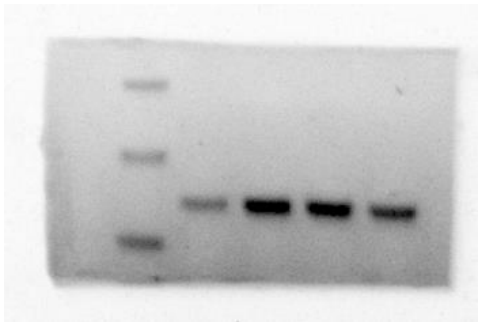

**GAPDH**  
(36 KD)

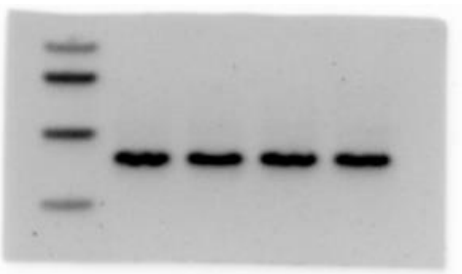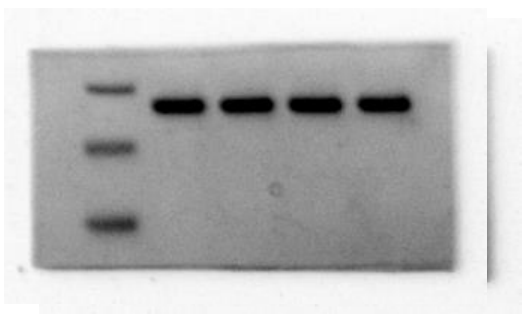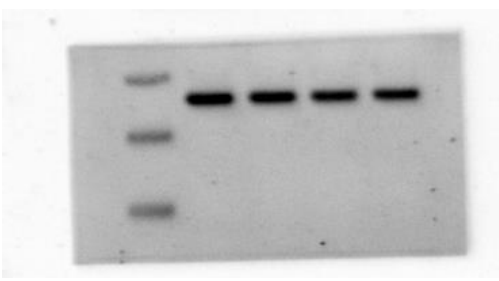

Fig6 E

1

2

3

M1

M2

M2

PCNA  
(30 KD)

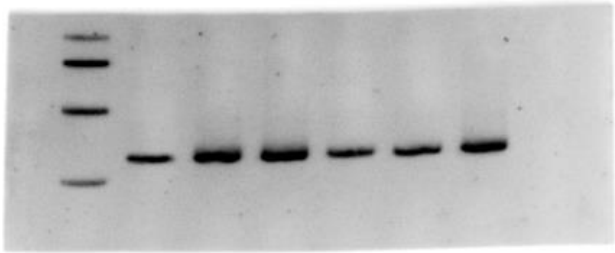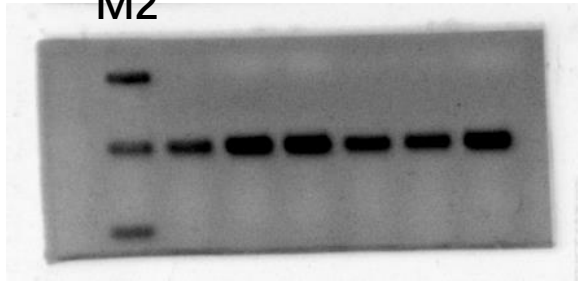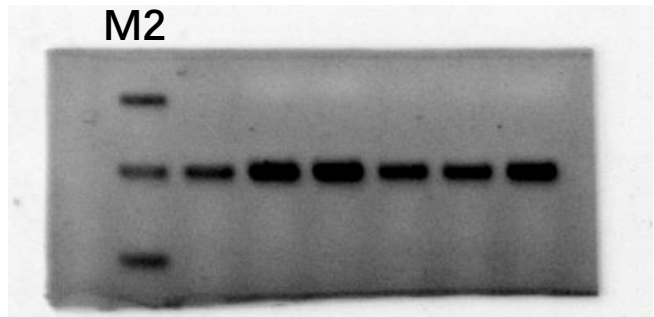

GAPDH  
(36 KD)

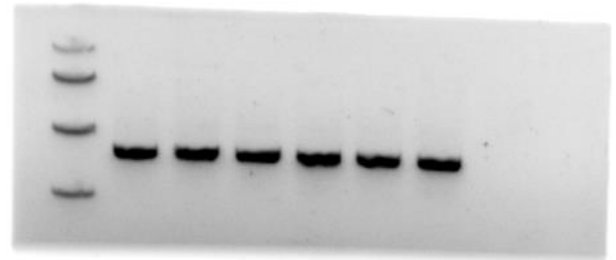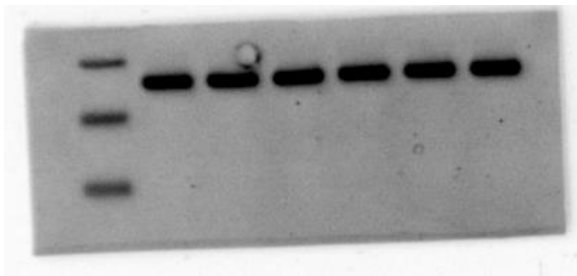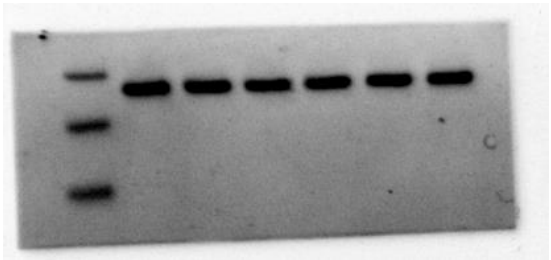

**Fig6 F**

**1**

**2**

**3**

M1

M2

M2

**$\alpha$ -SMA**  
(33 KD)

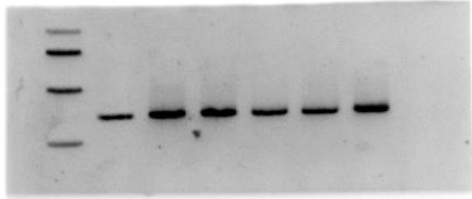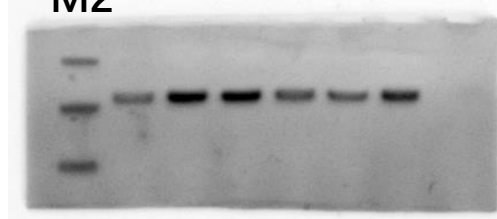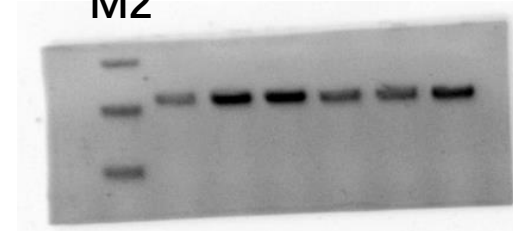

**Col I**  
(139 KD)

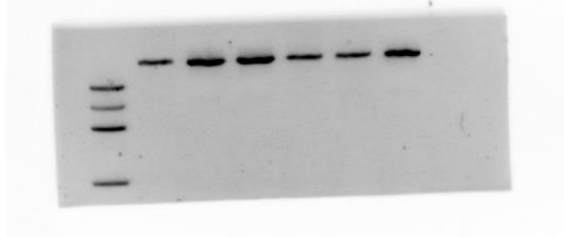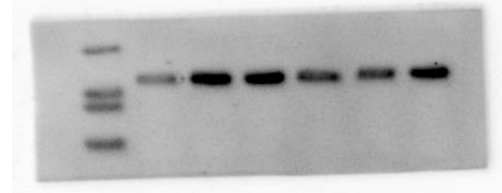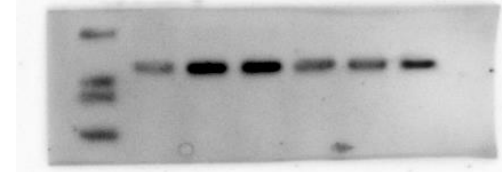

**FN**  
(285 KD)

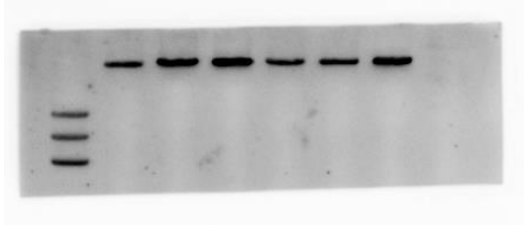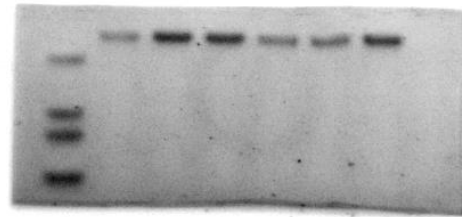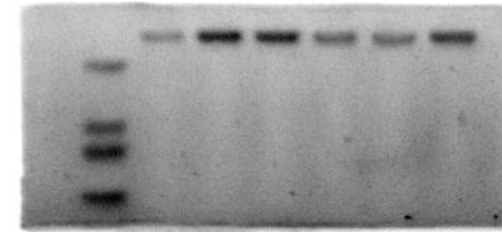

**Col IV**  
(163 KD)

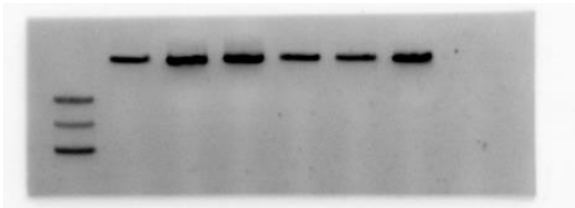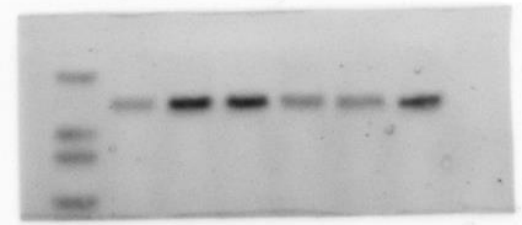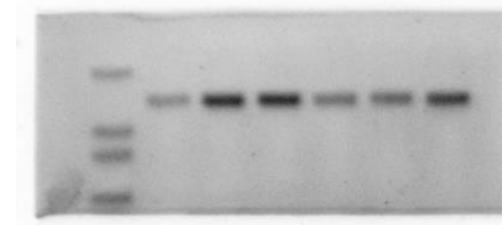

**GAPDH**  
(36 KD)

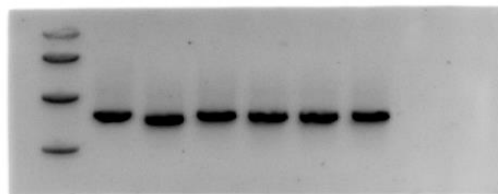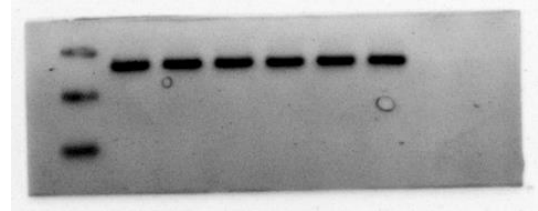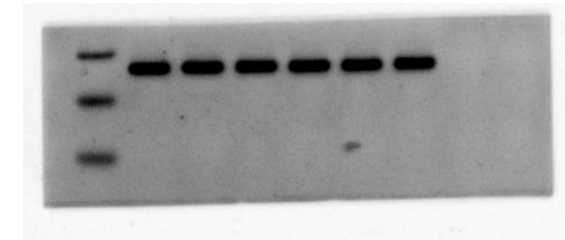

Supplement: MOESM1 [file 10863_2024_10027_MOESM1_ESM.pdf]
